# Supplementary material for: Evaluation of Four Commercial Vaccines for the Protection of Piglets against the Highly Pathogenic Porcine Reproductive and Respiratory Syndrome Virus (hp-PRRSV) QH-08 Strain
Source: MDPI journal article supplement (doi:10.3390/vaccines9091020), 2021-09-14
Supplement: s1 [file s1]

### Supplementary material

**Table S1.** Comparison of genetic similarities based on the nucleotide sequence of whole-genome and ORF1a and 1b and ORF<sub>2-7</sub> coding sequences of the QH-08 (China) reference PRRSV field isolates with 32 field and vaccine strains, originated from diversified epidemiological areas. Twelve out of these 33 PRRSV gene sequences are of Chinese origin.

| No. | isolate                   | genebank | Y    | Whole | ORF1a and 1b | ORF2   | ORF3   | ORF4  | ORF5  | ORF6   | ORF7  | Origin                                |
|-----|---------------------------|----------|------|-------|--------------|--------|--------|-------|-------|--------|-------|---------------------------------------|
| 1   | CH-1a                     | AY032626 | 1998 | 40%   | 28.2%        | 96.1%  | 92.9%  | 97.2% | 91.5% | 96.8%  | 92.7% | China                                 |
| 2   | JXA1                      | EF112445 | 2007 | 97.2% | 96.3%        | 99.6%  | 98.4%  | 95.5% | 97.5% | 98.9%  | 99.2  |                                       |
| 3   | HUN4                      | EF635006 | 2007 | 97%   | 96.1%        | 99.2%  | 98.8%  | 97.8% | 98%   | 98.9%  | 99.2  |                                       |
| 4   | QH-08                     | KU201579 | 2008 | -     | -            | 256, - | 254, - | -     | -     | 174, - | -     |                                       |
| 5   | GM2                       | JN662424 | 2011 | 34.6% | 19.9%        | 88.7%  | 88.2%  | 94.4% | 81.5% | 94.8%  | 88.6  |                                       |
| 6   | NVDC-C Q1-2012            | KP771747 | 2012 | 96.8% | 95.8%        | 99.6%  | 98.8%  | 97.8% | 98%   | 98.9%  | 99.2  |                                       |
| 7   | SD-A19                    | MF372560 | 2015 | 33.8% | 24.9%        | 85.5%  | 79.9%  | 86%   | 16.1% | 92.5%  | 90.2  |                                       |
| 8   | JL580                     | KR706343 | 2015 | 33.7% | 19.9%        | 90.2%  | 97.2%  | 94.9% | 84%   | 93.1%  | 89.4  |                                       |
| 9   | HK2                       | KF287133 | 2003 | 37.1% | 24.3%        | 91.4%  | 85.4%  | 87.6% | 83%   | 96%    | 93.5  |                                       |
| 10  | HK6                       | KF287135 | 2014 | 37%   | 24%          | 89.1%  | 84.3%  | 89.3% | 86.5% | 96%    | 92.7  |                                       |
| 11  | VR2332                    | EF536003 | 2007 | 37.9% | 25.3%        | 91%    | 85.8%  | 89.9% | 86.5% | 96.6%  | 93.5  |                                       |
| 12  | NCV-13 MLV                | KX192112 | 2016 | 33.9% | 18.8%        | 85.2%  | 83.5%  | 88.8% | 87.5% | 93.1%  | 89.4  |                                       |
| 13  | RespPRRS /Repro           | AF159149 | 2000 | 36.5% | 25.1%        | 91.8%  | 85.8%  | 89.9% | 87.5% | 96%    | 94.3  | U.S.A                                 |
| 14  | NADC30                    | JN654459 | 2008 | 34%   | 20.4%        | 85.9%  | 80.3%  | 88.2% | 85.5% | 92%    | 90.2  |                                       |
| 15  | CVK3-6                    | KP704287 | 2015 | 38.8% | 26.5%        | 91.8%  | 87%    | 88.8% | 86%   | 94.8%  | 91.9  | Democratic People's Republic of Korea |
| 16  | PL97-1                    | AY585241 | 1997 | 38%   | 25.4%        | 92.2%  | 85.8%  | 89.9% | 87.5% | 10.9%  | 94.3  |                                       |
| 17  | CA-2-MP1 10               | KY363991 | 2016 | 34%   | 19.3%        | 85.2%  | 83.5%  | 89.9% | 87.5% | 93.1%  | 92.7  | Thailand                              |
| 18  | HP/Thailand/19500L L/2010 | KF735060 | 2013 | 95.7% | 95.2%        | 98.4%  | 98.8%  | 99.4% | 99%   | 98.8%  | 98.4  |                                       |
| 19  | 01NP1.2                   | DQ056373 | 2005 | 38%   | 25.1%        | 92.2%  | 85.8%  | 89.9% | 87.5% | 93%    | 94.3  | Singapore                             |
| 20  | SP                        | AF184212 | 1999 | 38%   | 25.6%        | 91.4%  | 85.4%  | 91.6% | 91%   | 94.8%  | 94.3% |                                       |
| 21  | PA8                       | AF176348 | 2002 | 37.8% | 25%          | 91.8%  | 86.2%  | 88.8% | 87%   | 96%    | 94.3% | Canada                                |
| 22  | DK-2011-0 30311-1         | KC862577 | 2011 | 37.9% | 25.3%        | 92.6%  | 85.8%  | 88.8% | 88%   | 96.6%  | 94.3% |                                       |
| 23  | DK-2003-2 -3              | KC862584 | 2003 | 37.3% | 43.5%        | 90.6%  | 86.8%  | 90.4% | 87.5% | 96.6%  | 95.1  | Denmark                               |
| 24  | VR-2332 PRRSV-2           | AY150564 | 2002 | 38%   | 25.4%        | 92.6%  | 85.4%  | 89.9% | 88%   | 96.6%  | 94.3  |                                       |
| 25  | Hungary 102 2012          | KM514315 | 2012 | 33.9% | 19.3%        | 87.1%  | 83.9%  | 88.2% | 87%   | 93.7%  | 93.5  | Hungary                               |
| 26  | TD1                       | KP998425 | 1997 | 37.3% | 25.3%        | 91.8%  | 86.2%  | 90.4% | 85%   | 94.3%  | 94.3  | Taiwan                                |
| 27  | MD001                     | KP998431 | 1991 | 35.9% | 25.2%        | 91%    | 87%    | 91%   | 86%   | 96%    | 91.1  |                                       |
| 28  | CH8V-J2 PRRSV/M           | KP998426 | 2003 | 35.5% | 22.2%        | 88.3%  | 84.6%  | 88.8% | 85%   | 94.8%  | 94.3  | India                                 |
| 29  | Z/IND/1A /18              | MK287894 | 2018 | 93.8% | 94%          | 98%    | 97.2%  | 98.3% | 96.5% | 98.9%  | 96.7  |                                       |
| 30  | BH58/10                   | JN626287 | 2010 | 95.9% | 95.4%        | 98.4%  | 98.8%  | 99.4% | 99%   | 98.9%  | 99.2  | Laos                                  |

|    |                |          |      |       |       |       |       |       |       |       |      |             |
|----|----------------|----------|------|-------|-------|-------|-------|-------|-------|-------|------|-------------|
| 31 | Aomori10-5     | AB811789 | 2010 | 35.5% | 22%   | 87.8% | 82.6% | 89.3% | 87%   | 93.7% | 85.2 | Japan       |
| 32 | EDRD-1         | AB811785 | 1992 | 36.5% | 23.1% | 90.2% | 84.6% | 93.3% | 89.5% | 94.8% | 93.5 |             |
| 33 | Lelystad virus | M96262   | 1993 | 27.4  | 9.3%  | 91%   | 23.6% | 27.5% | 5.5%  | 12.1% | 15.4 | Netherlands |

The sequence alignment results showed that the amino acid identities of ORF1a and 1b among 33 sequences of species-2 strains ranges from (9.3-96.3 %) (JL580, JXA1). Higher sequence similarities (>93 %) among these strains based on the reference sequence observed recorded in JXA1, HUN4, NVDC-CQ1, 2012, HP/Thailand/19500LL/2010, PRRSV/MZ/IND/1A/18, and BH58/10. Similarly, sequence identities score based on the amino acid sequence of ORF range (16.1-99%) lower and higher in SD-A19 and H.P./Thailand/19500LL/2010), respectively. When compared nucleotide sequence identity of whole-genome of the genotype 1&2 based on QH-08 Chinese PRRSV reference strains, the isolates had (33.7-97.2%) closely and distantly related to SD-A19 and JXA1, respectively (Table 2).

The percentage of complete genome homology of these seven strains is 93.8-97.2% (PRRSV/MZ/IND/1A/18, JXA1), which is roughly similar to the percentage sequence identity based on ORF1a1b (94-96.3%, PRRSV/MZ/IND/1A/18 and JXA1 strain), and ORF5 sequence (96-99%, PRRSV/MZ/IND/1A/18, BH58/10 and H.P./Thailand19500LL/2010 strain) (Table 2). The ORF2-ORF7 of 7 strains on the same lineage has a higher 98% amino acid sequence similarity than other strains.

Phylogenetic analysis of whole-genome sequence showed that only seven strains exhibited single homology with QH-08 isolate (Figure 2, red box). Meanwhile, ORF2-ORF7 and ORF 5 aligned sequence analysis showed six strains formed the single homology with QH-08 (Figures 2 and 3, red box). The homology of these seven strains is 93.8-97.2% (PRRSV/MZ/IND/1A/18, JXA1) is directly related to the ORF1a and 1b of 7 genotypes-2 ranges from 94-96.3 % including of JXA1、HUN4、QH-08、NVDC-CQ1-2012 、 PRRSV/MZ/IND/1A/18 、 H.P./Thailand19500LL/2010 and BH58/10. So, based on these facts, we investigated that the gap of ORF1a and 1b homology caused the difference of the whole sequence of PRRSV and may reveal partial protection of the PRRS vaccine when some homologous virus challenged.

On the other hand, a higher score of sequence identity recorded in ORF6 is 92-98.9% (HENAN-XINX, HUN4), ORF7 is 88.6-99.2% (GM2, HUN4), ORF4 is 88.2-99.4% (NADC30, H.P./Thailand/19500LL/2010), ORF2 is 85.2-99.6% (CA-2-MP110, JXA1), ORF3 is 80.3-98.8% (NADC30, HUN4) as detailed in (Table 2). Briefly, we found that the ORF6 sequences (92%-98.9%) of the strains of the Chinese mainland showed distinctive conservation compared to the other genes, followed by ORF7, ORF4, ORF2, ORF3, and ORF5. ORF7, ORF2, and ORF5s genes exist in insertion and deletion, such as Aomori10-5 and JXA1.

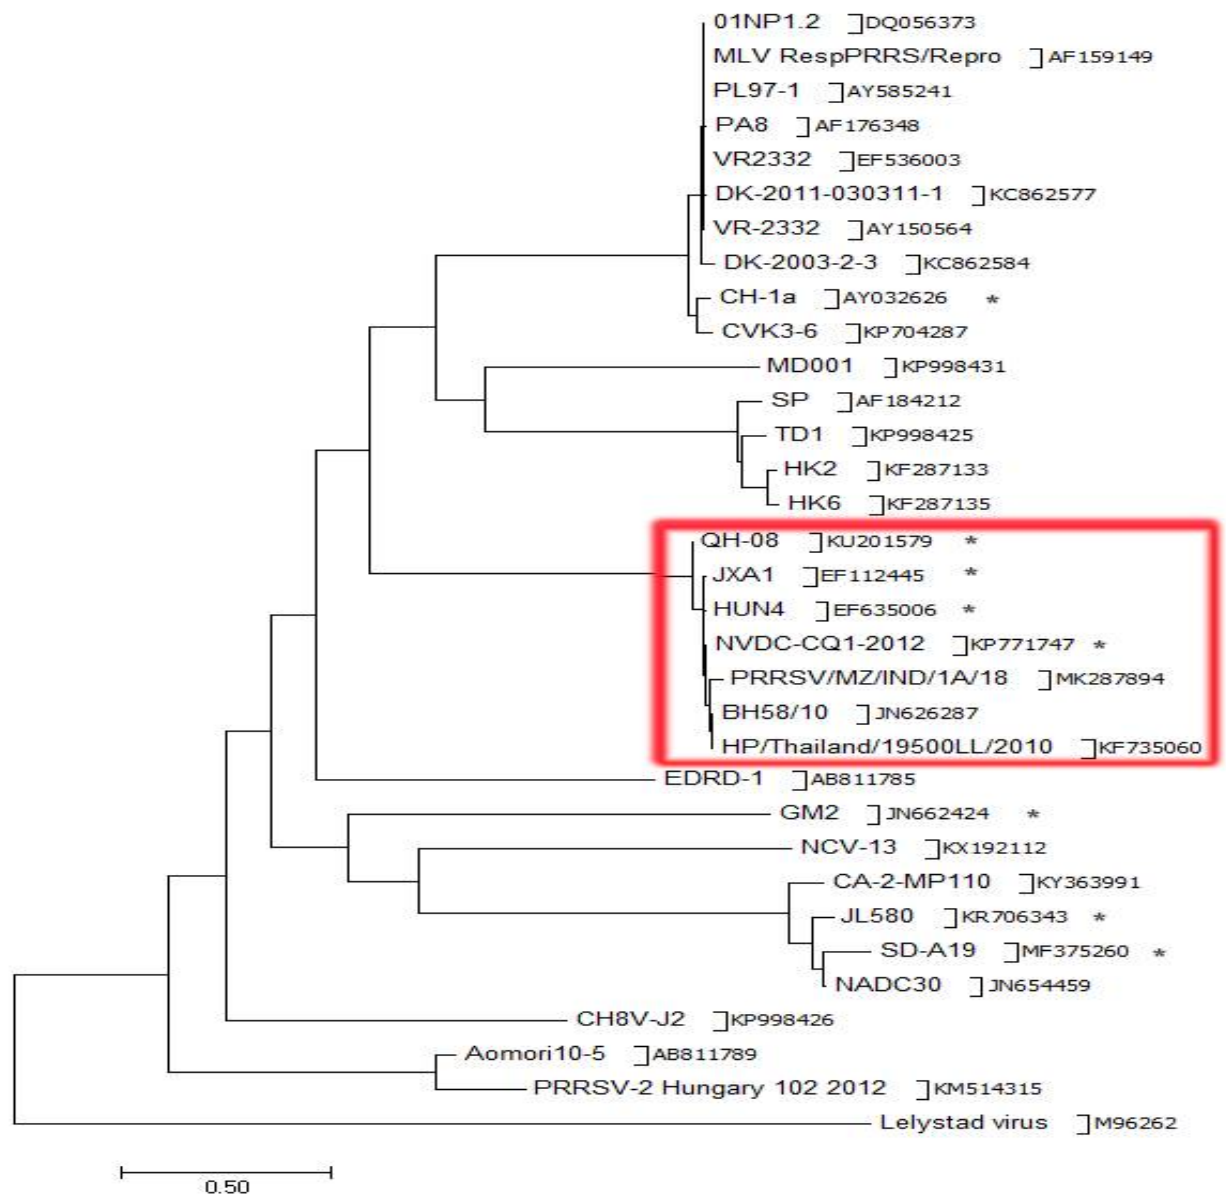

**Figure S1.** Phylogenetic analysis of PRRSV Type 1&2 of 33 whole-genome sequences; the result showed that only six strains exhibited single homology with new isolate QH-08 as represented in the red box in the phylogenetic tree.

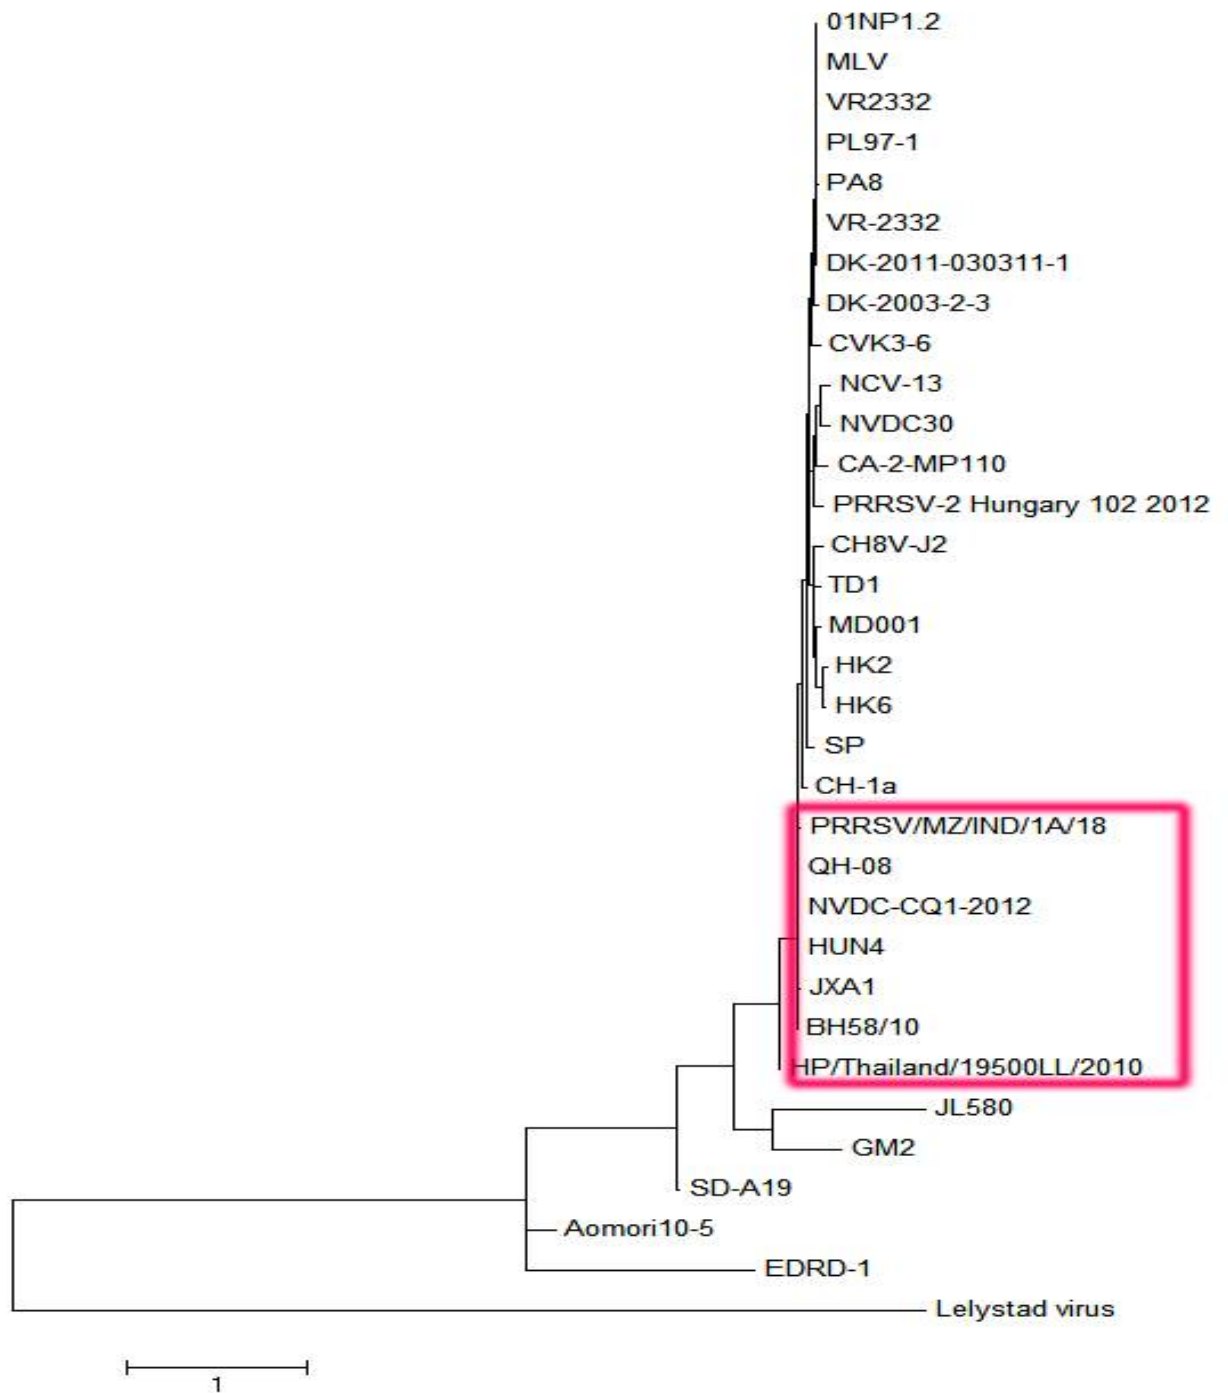

**Figure S2.** Phylogenetic tree constructed from aligned amino acid sequences of ORF2s to ORF7s of Porcine reproductive and Respiratory Syndrome Virus (PRRSV) Type 1&2 with the reference sequence of QH-08 isolate by the neighbor-joining methods.

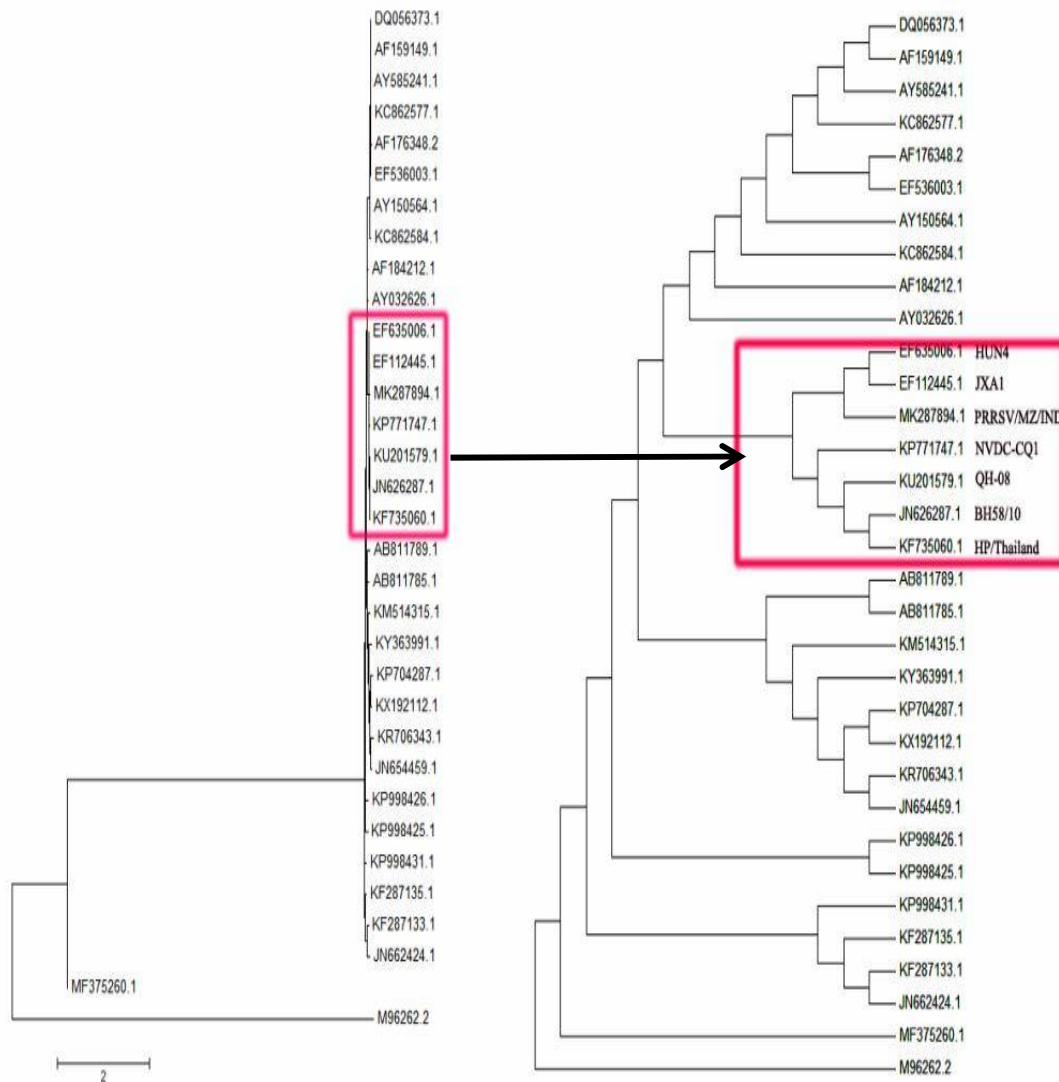

**Figure S3.** This phylogenetic tree compares 32 different PRRSV vaccine and field strains with reference strains (QH-08 isolate) (1991–2018) based on amino acid sequences of ORF5s. The closely related strains are marked with the red color inbox as indicated on the trees.

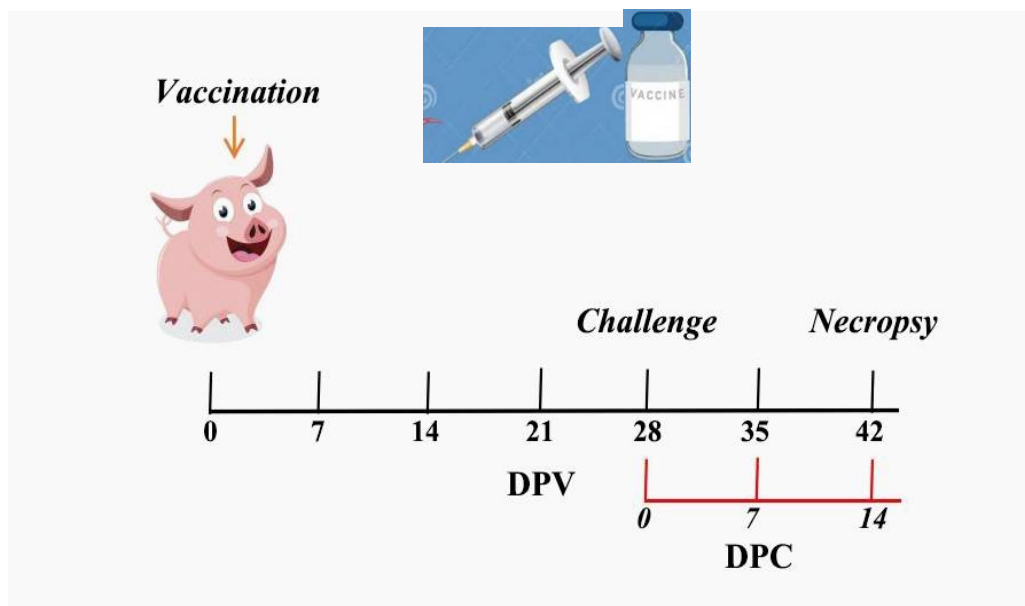

**Figure S4.** This schematic diagram shows the overall experimental design in this study. On day 0, piglets were immunized with four vaccines and PBS. At 28 dpv, pigs in group-1 to group-5 were infected by QH-08. On 42th day, all piglets were necropsied and examined for macroscopic and microscopic lesions.

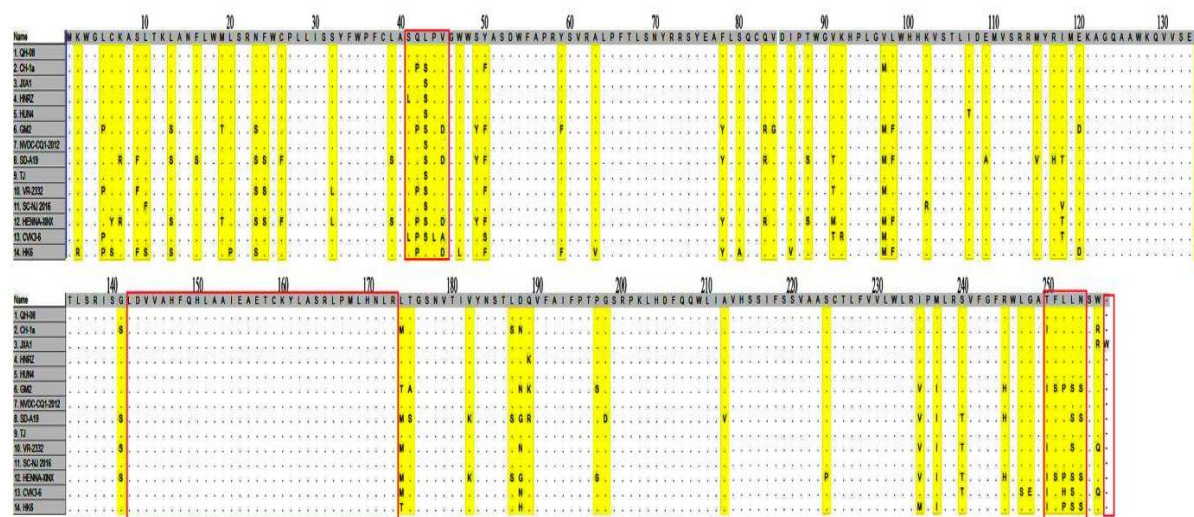

**Figure S5.** Mutational ORF2 of QH-08.

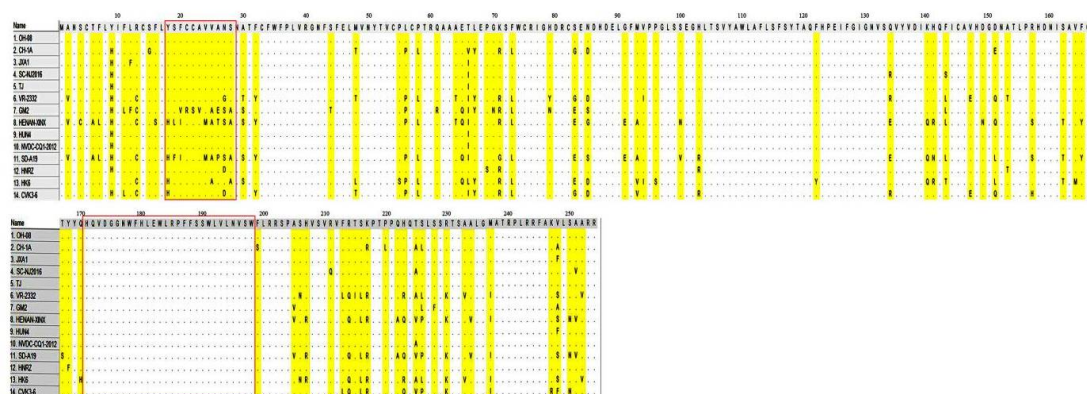

**Figure S6.** Mutational ORF3 of QH-08.

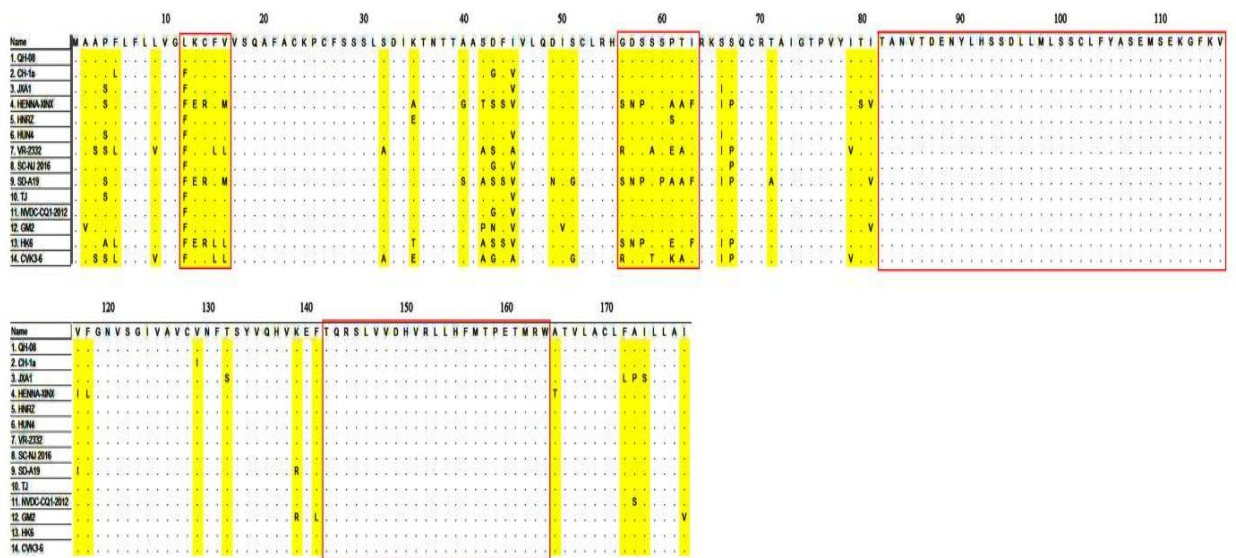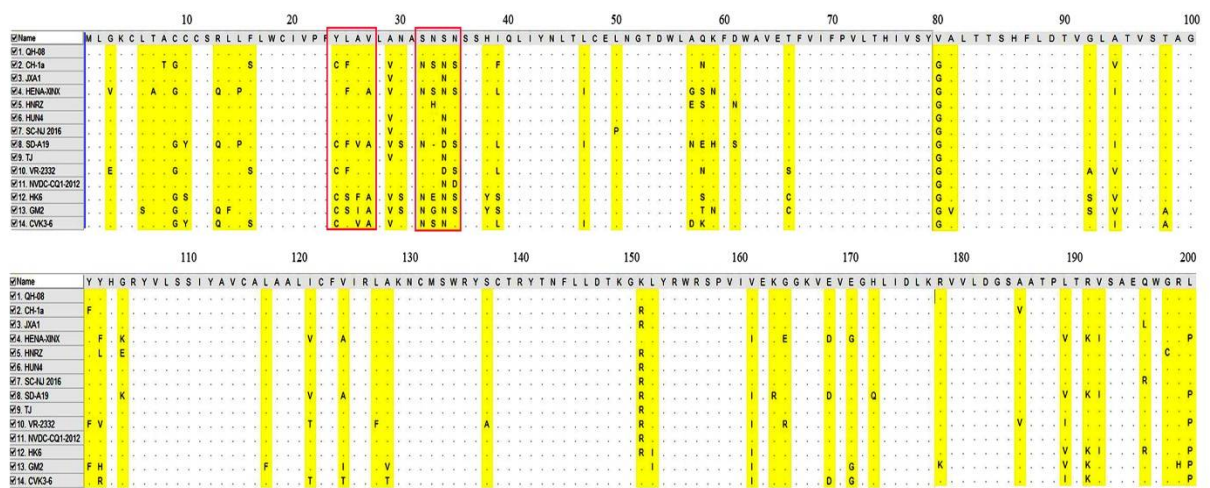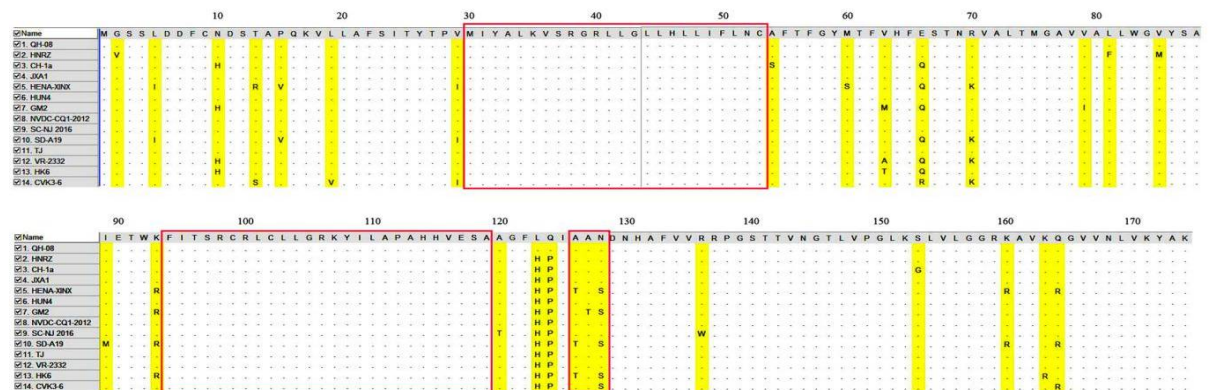

[illegible]

**Figure S10.** Mutational ORF7 of QH-08.
